# Supplementary material
Source: PubMed Central journal article supplement (PMC7095382)

**Lung**

Phenotype:

**CD4**

**CD8**

**Control**

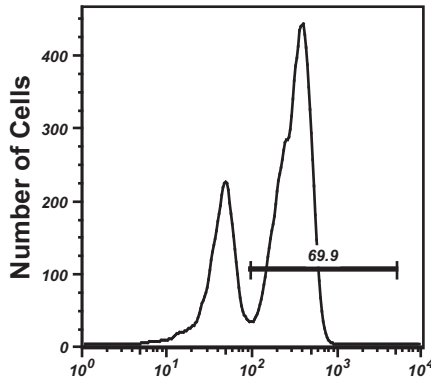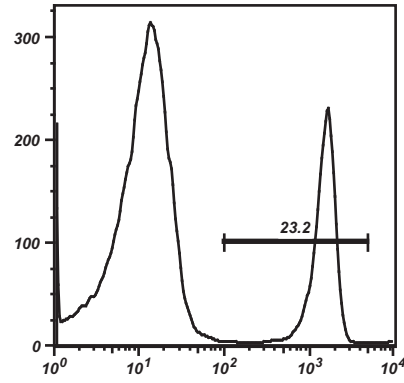

**CD4**

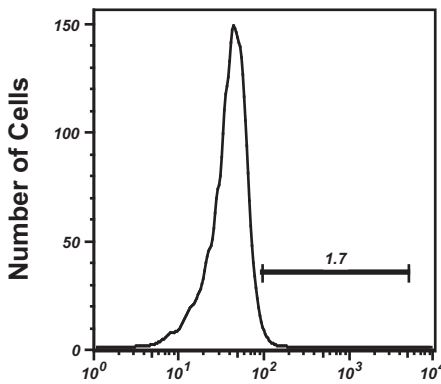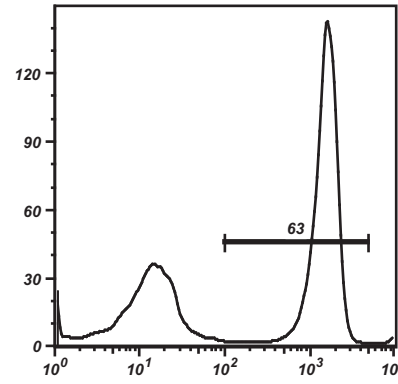

**CD8**

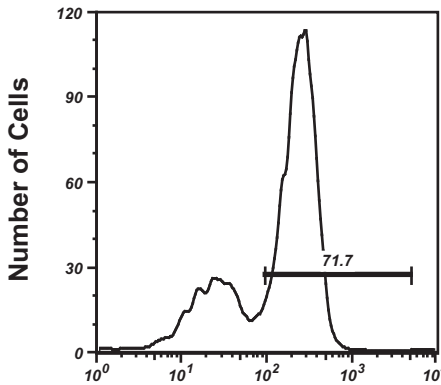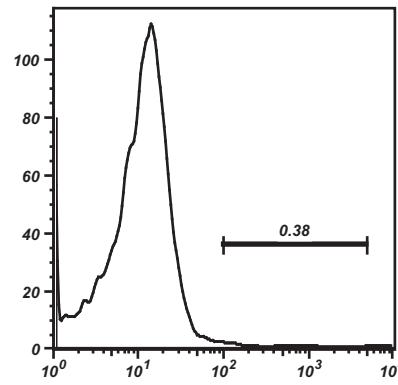

**CD4  
CD8  
CD90**

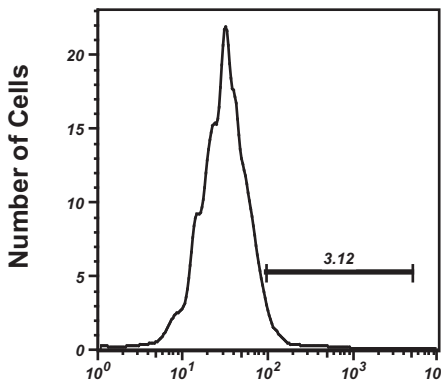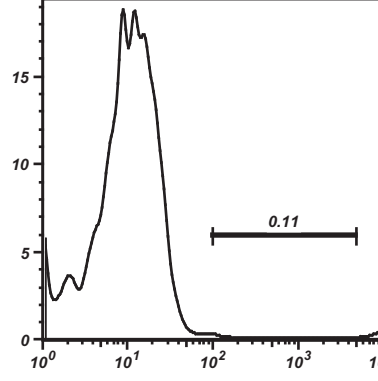

Monoclonal Antibody Depletion

Fluorescent Intensity

**Spleen**

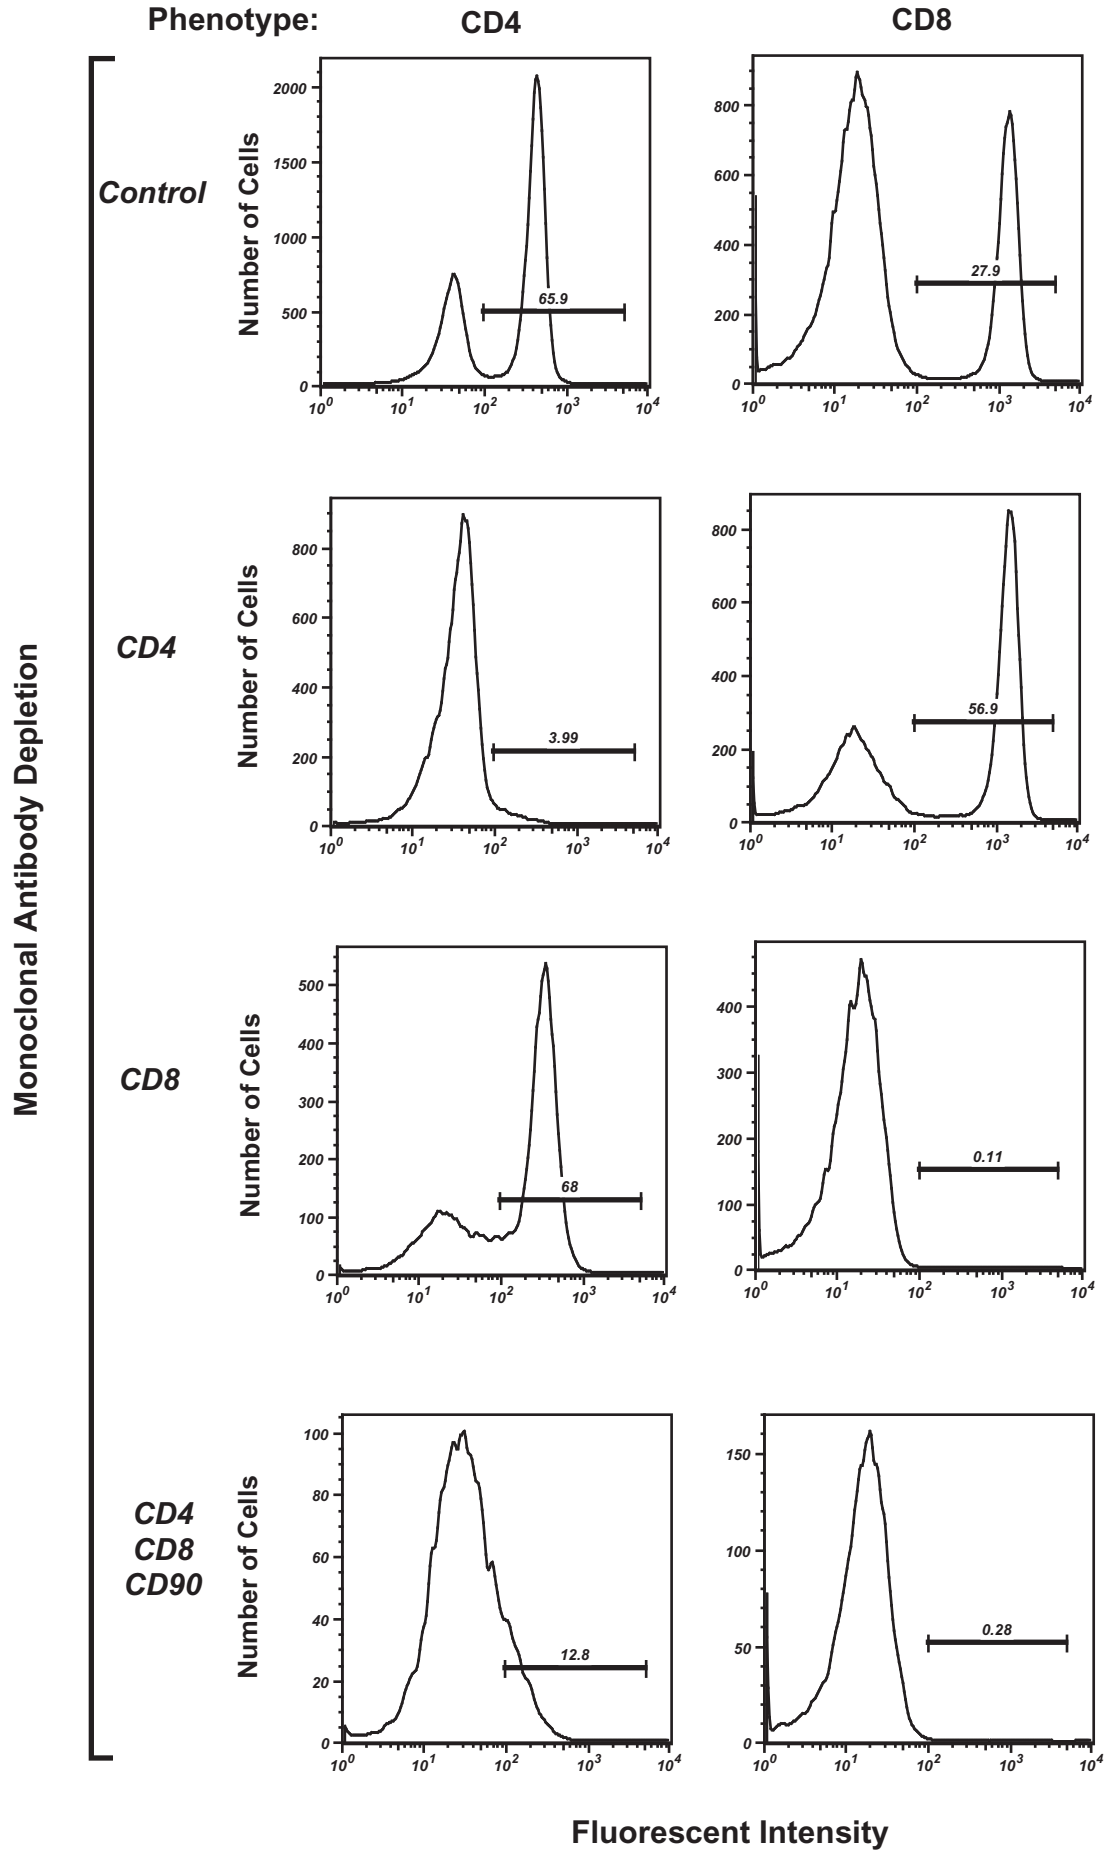

Supplement: 41586_2004_BFnature02463_MOESM1_ESM.pdf [file 41586_2004_BFnature02463_MOESM1_ESM.pdf]
